# Supplementary material for: Crumpled graphene-encapsulated sulfur for lithium–sulfur batteries
Source: Royal Society of Chemistry journal article supplement (doi:10.1039/c8ra03255f), 2018-01-01
Supplement: c8ra03255f1.pdf [file c8ra03255f1.pdf]

## Supporting information

### **Crumpled graphene-encapsulated sulfur for lithium-sulfur batteries**

Xianfei Hu,<sup>a,b</sup> Kaitong Leng,<sup>a,b</sup> Cuijuan Zhang,<sup>\*,a,b</sup> Jiayan Luo<sup>\*,a,b</sup>

<sup>a</sup>. Key Laboratory for Green Chemical Technology of Ministry of Education, School of Chemical Engineering and Technology, Tianjin University, Tianjin 300350, China

<sup>b</sup>. Collaborative Innovation Center of Chemical Science and Engineering (Tianjin), Tianjin 300350, China

\*Corresponding author: [cjzhang@tju.edu.cn](mailto:cjzhang@tju.edu.cn), [jluo@tju.edu.cn](mailto:jluo@tju.edu.cn)

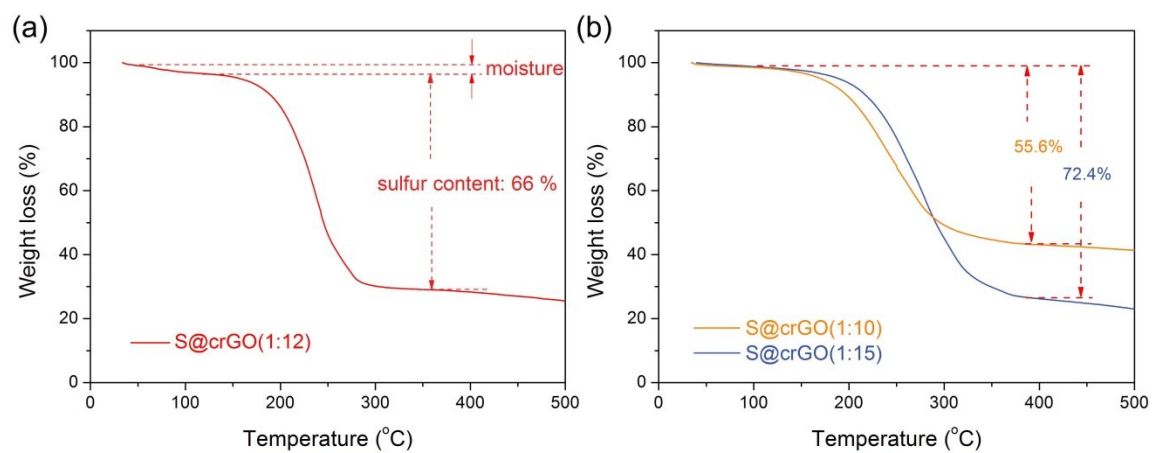

Fig. S1. TGA result of S@crGO with different mass ratios of GO/Na<sub>2</sub>S<sub>2</sub>O<sub>3</sub> in N<sub>2</sub> at a heating rate of 5 °C min<sup>-1</sup>, (a) 1:12, (b) 1:10 and 1:15. The S-loading is 66.0%, 55.6%, and 72.4%, respectively

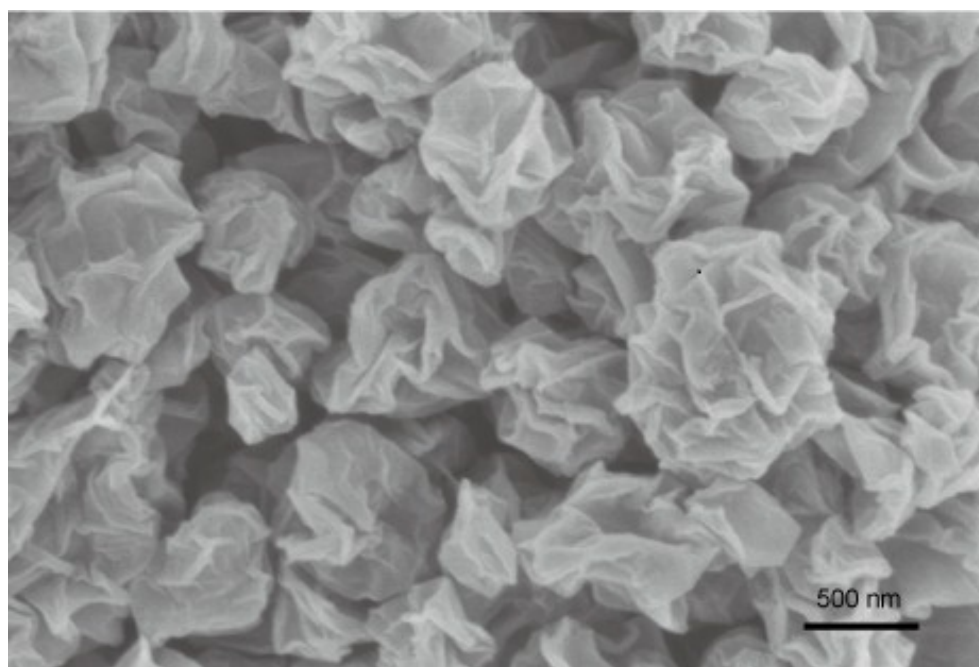

Fig. S2. SEM image of pure crumpled graphene.

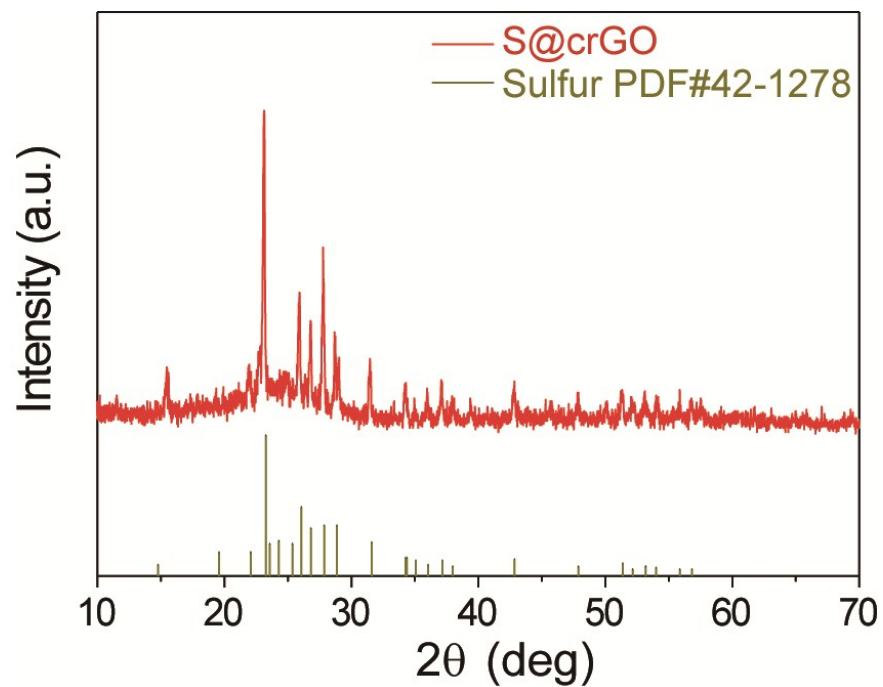

Fig. S3. XRD patterns of S@crGO at room temperature.

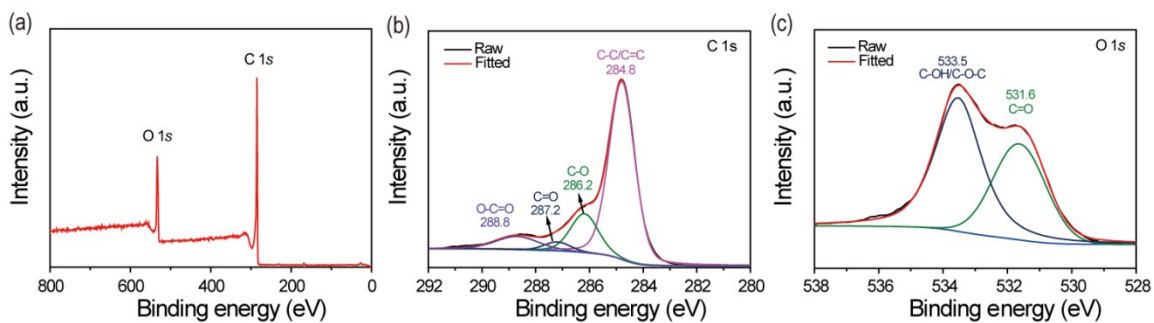

Fig. S4. (a) Survey XPS spectra of pure crumpled graphene, and corresponding (b) high-resolution XPS spectra of C, O.

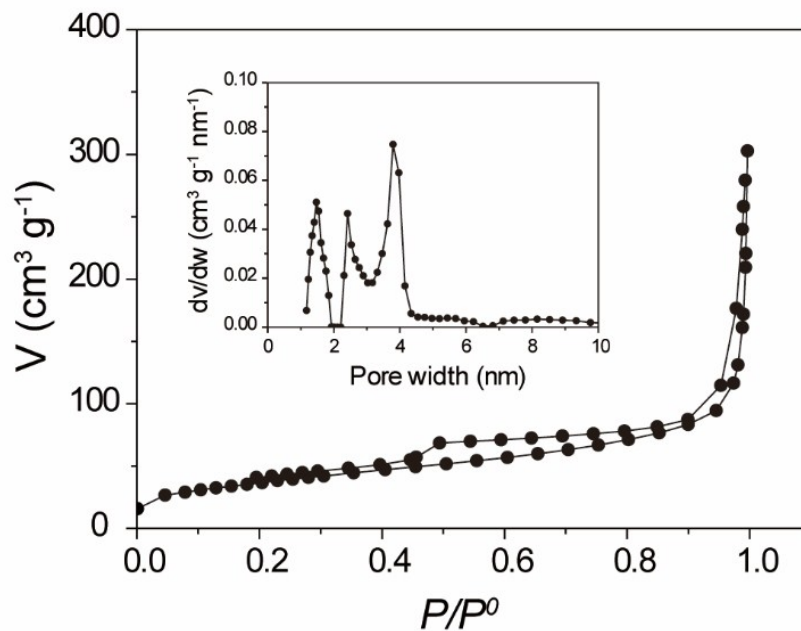

Fig. S5. N<sub>2</sub> isotherm curves and corresponding pore size distribution of pure crumpled graphene.

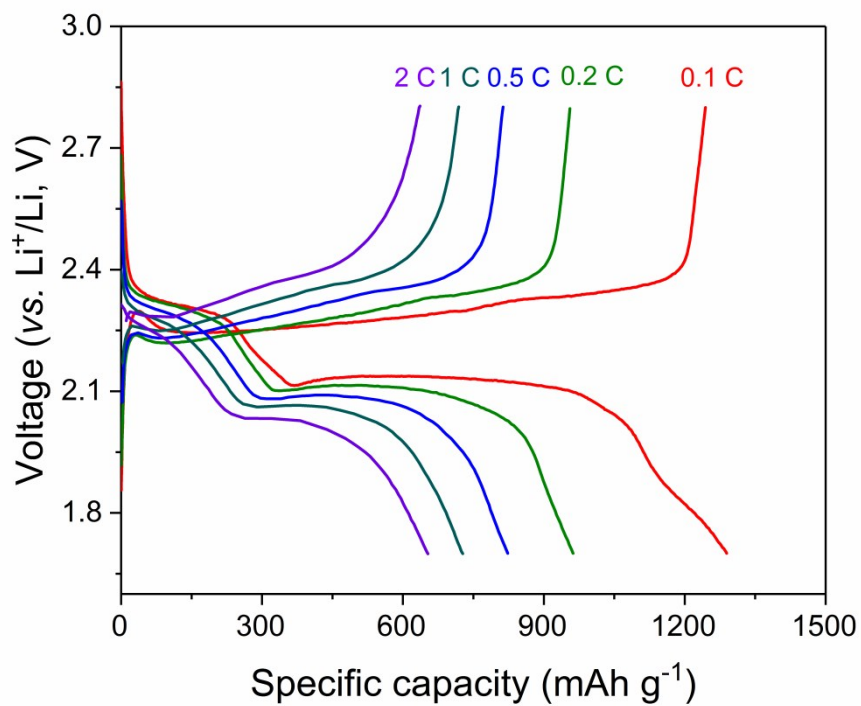

Fig. S6. Galvanostatic charge-discharge profiles of Li-S battery with S@crGO as cathode.

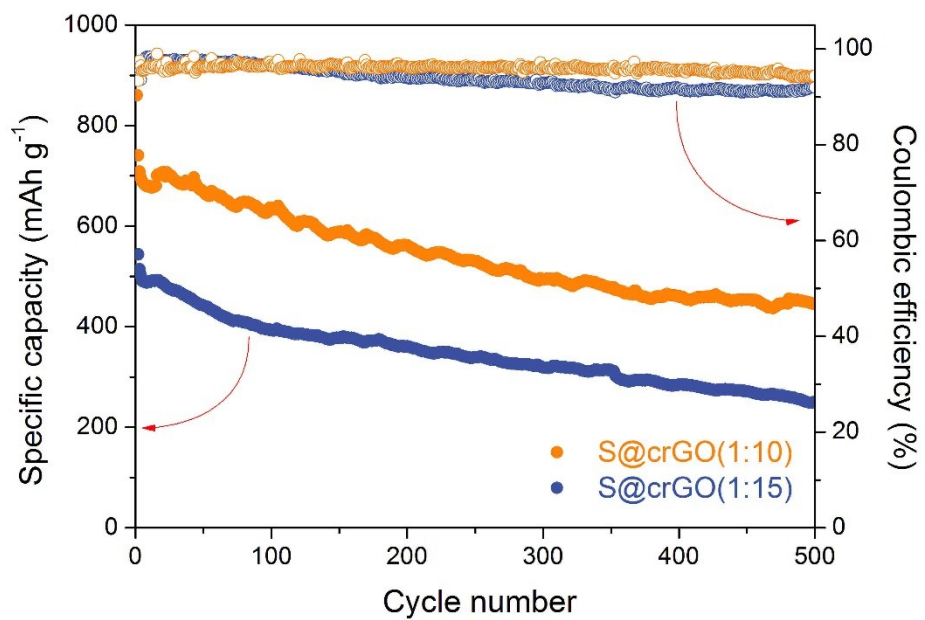

Fig. S7. Cycle performance of S@crGO(1:10) and S@crGO(1:15) at the rate of 0.5 C.
